# Supplementary material
Source: MDPI journal article supplement (https://www.mdpi.com/2073-445X/10/8/817)
Supplement: s1 [file s1]

## Electronic Supplementary Material 1

**Table S1.** Classes of the land-cover maps for the analysis of global changes in the Iberian Peninsula developed by the Grumets Research Group of the Universitat Autònoma de Barcelona. Agriculture (C) and forest (F) general classes.

| Land-Cover Classes |                                   |
|--------------------|-----------------------------------|
| 1                  | Water                             |
| 2                  | Rice crops (A)                    |
| 3                  | Needleleaf forest (F)             |
| 4                  | Irrigated herbaceous cropland (A) |
| 5                  | Rainfed herbaceous cropland (A)   |
| 6                  | Irrigated woody cropland (A)      |
| 7                  | Rainfed woody cropland (A)        |
| 8                  | Broadleaf deciduous forest (F)    |
| 9                  | Broadleaf evergreen forest (F)    |
| 10                 | Shrublands                        |
| 11                 | Pastures (A)                      |
| 12                 | Bare soil                         |
| 13                 | Urban                             |
| 14                 | Greenhouse                        |
| 15                 | Recent wildfires                  |

**Table S2.** Moran's I Autocorrelation Index of secondary forest establishment for the study sample (A) and the residuals of the GLM with the selected explanatory variables (B). The table shows the computed Moran's I (Observed), the expected value (Expected) and the standard deviation (SD) of I under the null hypothesis and the p-value of the test for the null hypothesis.

| Moran's I of Secondary Forest Establishment |           |                   |           |
|---------------------------------------------|-----------|-------------------|-----------|
| (A) Sample                                  |           | (B) GLM Residuals |           |
| Observed                                    | 0.0706644 | Observed          | 0.026866  |
| Expected                                    | -0.000333 | Expected          | -0.000333 |
| SD                                          | 0.0018441 | SD                | 0.0018441 |
| p-value                                     | <0.001    | p-value           | 0.015860  |

**Table S3.** Moran's I Autocorrelation Index of secondary forest growth (aboveground biomass; Mg ha<sup>-1</sup>) for the study sample (A) for the residuals of the GLM with the selected explanatory variables (B). The table shows the computed Moran's I (Observed), the expected value (Expected) and the standard deviation (SD) of I under the null hypothesis and the p-value for the test of the null hypothesis.

| <b>Moran's I of Secondary Forest Growth</b> |           |                          |           |
|---------------------------------------------|-----------|--------------------------|-----------|
| <b>(A) Sample</b>                           |           | <b>(B) GLM Residuals</b> |           |
| Observed                                    | 0.251561  | Observed                 | 0.005039  |
| Expected                                    | -0.000333 | Expected                 | -0.000333 |
| SD                                          | 0.003006  | SD                       | 0.003006  |
| p-value                                     | <0.001    | p-value                  | 0.003358  |

## Electronic Supplementary Material 2

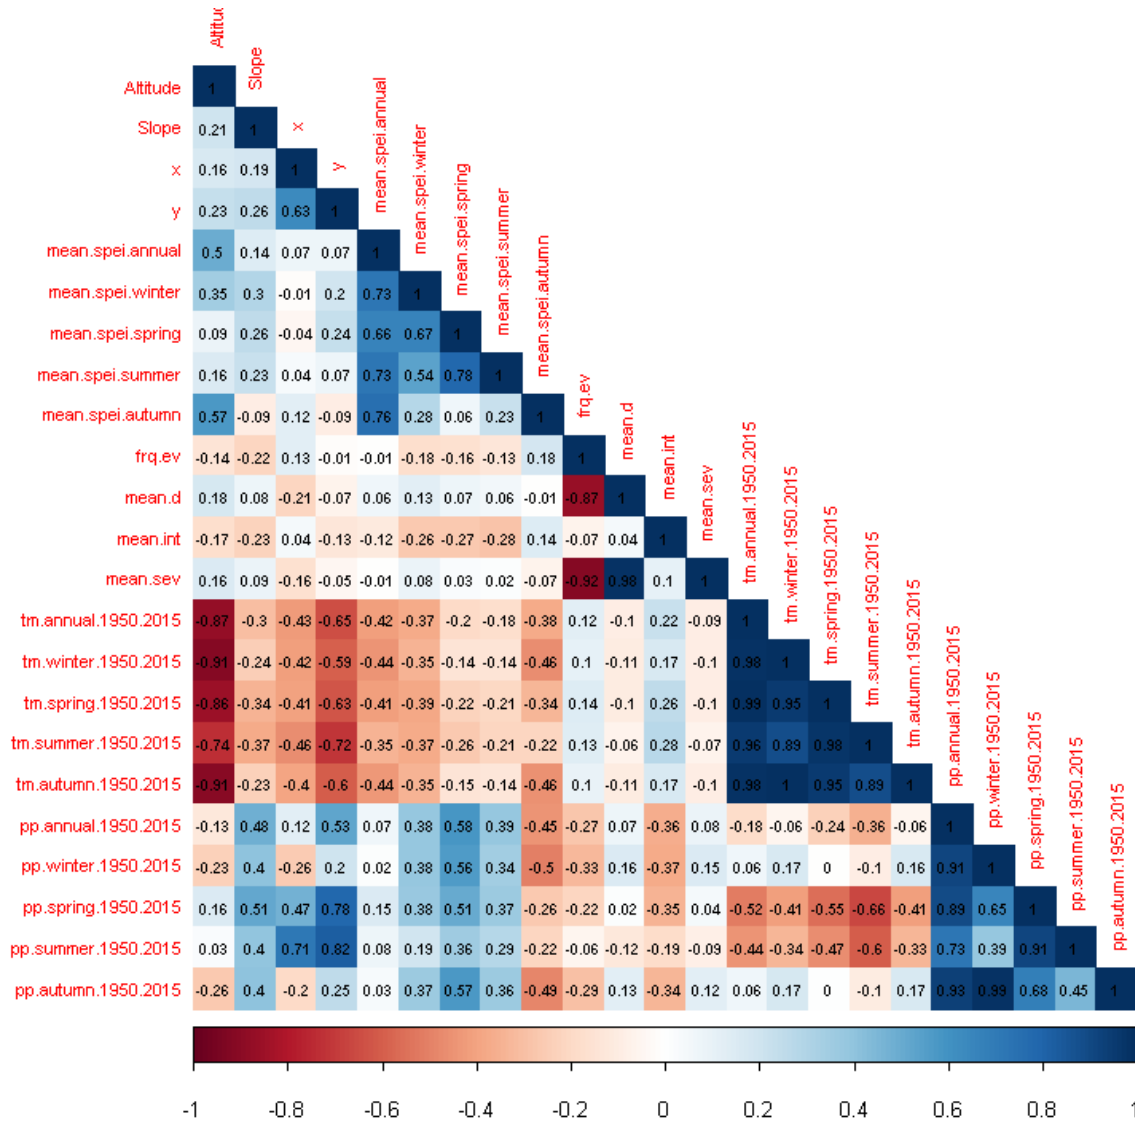

**Figure S1.** Spearman correlation matrix for the environmental predictors to potentially be included in the study regarding the changes of forest establishment over time. x—longitude, y—latitude, Altitude—elevation, frq.ev—drought events frequency, mean.d—mean duration of drought events, mean.int—mean intensity of drought events, mean.sev—mean severity of drought events, tm—mean annual temperature, pp—annual precipitation. Climatic variables were calculated for the period 1950-2015.

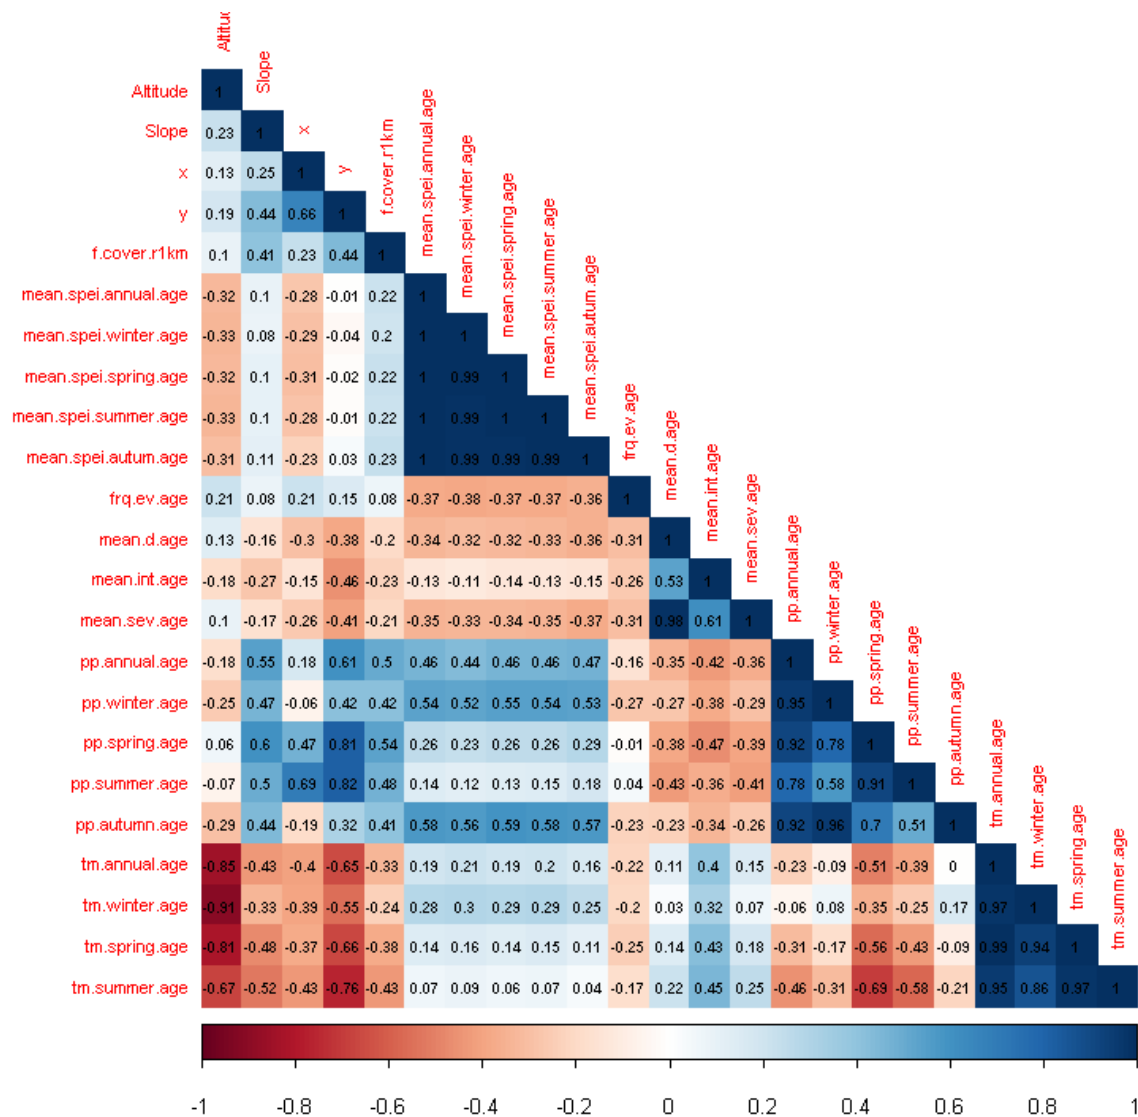

**Figure S2.** Spearman correlation matrix for the environmental predictors to potentially be included in the study regarding the impact on secondary forest biomass. x—longitude, y—latitude, Altitude—elevation, frq.ev—drought events frequency, mean.d—mean duration of drought events, mean.int—mean intensity of drought events, mean.sev—mean severity of drought events, tm—mean annual temperature, pp—annual precipitation. Climatic variables were calculated for the period of secondary forest growth (age).
